# Supplementary material
Source: HighWire-hosted journal article supplement (http://molpharm.aspetjournals.org/highwire/filestream/77027/field_highwire_adjunct_files/0/Supplements75994.pdf)
Supplement: Supplements75994.pdf [file Supplements75994.pdf]

## **Supplements to the manuscript**

### **Regulation of interferon-inducible proteins by doxorubicin via IFN $\gamma$ -JAK-STAT signaling in tumor cells**

J. Hussner, MS; S. Ameling, PhD; E. Hammer, PhD; S. Herzog, MS; L. Steil, PhD; M. Schwebe, MS; J. Niessen, PhD; H.W.S. Schroeder, MD; H.K. Kroemer, PhD; C.A. Ritter, PhD; U. Völker, PhD; S. Bien, PhD

**Journal: Molecular Pharmacology**

**Supplemental Table 1.** Functional categorization of differentially expressed genes identified in HeLa cells upon doxorubicin treatment after 24 and 48 h determined by microarray analysis (>2 fold change).

| Ingenuity Canonical Pathways<br>( $p < 0.001$ )                                                                                                | total<br>molecules<br>known to<br>be<br>associated<br>to<br>pathway | -log (p-<br>value) | number of<br>repressed<br>genes<br>upon Dox<br>treatment | % down* | number<br>of<br>induced<br>genes<br>upon Dox<br>treatment | % up** |
|------------------------------------------------------------------------------------------------------------------------------------------------|---------------------------------------------------------------------|--------------------|----------------------------------------------------------|---------|-----------------------------------------------------------|--------|
| Interferon Signaling                                                                                                                           | 30                                                                  | 4.41               | 3                                                        | 10      | 16                                                        | 37     |
| HGF Signaling                                                                                                                                  | 100                                                                 | 4.01               | 28                                                       | 28      | 19                                                        | 53     |
| Cdc42 Signaling                                                                                                                                | 120                                                                 | 3.37               | 29                                                       | 24      | 18                                                        | 61     |
| Activation of IRF by Cytosolic<br>Pattern Recognition Receptors<br>Production of Nitric Oxide and<br>Reactive Oxygen Species in<br>Macrophages | 69                                                                  | 3.05               | 6                                                        | 9       | 24                                                        | 57     |
| LPS-stimulated MAPK Signaling                                                                                                                  | 160                                                                 | 3.01               | 31                                                       | 19      | 33                                                        | 60     |
| IL-17 Signaling                                                                                                                                | 75                                                                  | 2.87               | 17                                                       | 23      | 16                                                        | 56     |
| IL-17 Signaling                                                                                                                                | 74                                                                  | 2.82               | 14                                                       | 19      | 20                                                        | 54     |
| Role of Macrophages,<br>Fibroblasts and Endothelial Cells<br>in Rheumatoid Arthritis                                                           | 334                                                                 | 2.73               | 42                                                       | 13      | 69                                                        | 67     |
| PPAR Signaling                                                                                                                                 | 97                                                                  | 2.69               | 21                                                       | 22      | 16                                                        | 62     |
| Prolactin Signaling                                                                                                                            | 72                                                                  | 2.65               | 20                                                       | 28      | 12                                                        | 56     |
| IL-6 Signaling                                                                                                                                 | 91                                                                  | 2.62               | 13                                                       | 14      | 26                                                        | 57     |
| Glucocorticoid Receptor<br>Signaling                                                                                                           | 268                                                                 | 2.6                | 42                                                       | 16      | 52                                                        | 65     |
| Antigen Presentation Pathway                                                                                                                   | 39                                                                  | 2.6                | 0                                                        | 0       | 16                                                        | 59     |
| Molecular Mechanisms of<br>Cancer                                                                                                              | 359                                                                 | 2.45               | 70                                                       | 19      | 52                                                        | 66     |
| Type I Diabetes Mellitus<br>Signaling                                                                                                          | 111                                                                 | 2.43               | 8                                                        | 7       | 34                                                        | 62     |
| Role of Pattern Recognition<br>Receptors in Recognition of<br>Bacteria and Viruses                                                             | 75                                                                  | 2.41               | 6                                                        | 8       | 26                                                        | 57     |
| 4-1BB Signaling in T<br>Lymphocytes                                                                                                            | 33                                                                  | 2.39               | 5                                                        | 15      | 11                                                        | 52     |
| mTOR Signaling                                                                                                                                 | 145                                                                 | 2.39               | 38                                                       | 26      | 17                                                        | 62     |
| HMGB1 Signaling                                                                                                                                | 96                                                                  | 2.38               | 20                                                       | 21      | 20                                                        | 58     |
| PXR/RXR Activation                                                                                                                             | 72                                                                  | 2.37               | 12                                                       | 17      | 18                                                        | 58     |
| p53 Signaling                                                                                                                                  | 92                                                                  | 2.31               | 19                                                       | 21      | 20                                                        | 58     |
| HER-2 Signaling in Breast Cancer                                                                                                               | 79                                                                  | 2.26               | 20                                                       | 25      | 13                                                        | 58     |
| PPAR $\alpha$ /RXR $\alpha$ Activation                                                                                                         | 174                                                                 | 2.26               | 33                                                       | 19      | 27                                                        | 66     |
| AMPK Signaling                                                                                                                                 | 141                                                                 | 2.18               | 31                                                       | 22      | 21                                                        | 63     |
| TR/RXR Activation                                                                                                                              | 90                                                                  | 2.16               | 27                                                       | 30      | 10                                                        | 59     |
| IL-8 Signaling                                                                                                                                 | 173                                                                 | 2.16               | 31                                                       | 18      | 33                                                        | 63     |
| Dendritic Cell Maturation                                                                                                                      | 167                                                                 | 2.14               | 18                                                       | 11      | 38                                                        | 66     |
| CD40 Signaling                                                                                                                                 | 66                                                                  | 2.12               | 10                                                       | 15      | 17                                                        | 59     |

**MOL #75994**

|                           |     |      |    |    |    |    |
|---------------------------|-----|------|----|----|----|----|
| Glioma Signaling          | 107 | 2.1  | 28 | 26 | 12 | 63 |
| B Cell Receptor Signaling | 148 | 2.07 | 29 | 20 | 27 | 62 |
| SAPK/JNK Signaling        | 97  | 2.06 | 24 | 25 | 13 | 62 |

\* percentage of all known molecules belonging to the pathway that is down regulated

\*\* percentage of all known molecules belonging to the pathway that is up regulated

**Supplemental Table 2.** Expression levels of IFN-stimulatable genes in the presence or absence of doxorubicin. HeLa cells were incubated for 24 or 48 h with DMSO as solvent or 1  $\mu$ M doxorubicin. Gene expression was determined either using DNA microarray or qRT-PCR relative to the DMSO control at the respective time point. Abbreviations: Dox, Doxorubicin; f.c., fold change

| Gene symbol | Annotation                                                                        | Probe set                  | f.c.<br>24 h Dox<br>microarray | f.c.<br>24 h Dox<br>qRT-PCR | f.c.<br>48 h Dox<br>microarray | f.c.<br>48 h Dox<br>qRT-PCR |
|-------------|-----------------------------------------------------------------------------------|----------------------------|--------------------------------|-----------------------------|--------------------------------|-----------------------------|
| STAT1       | signal transducer and activator of transcription 1                                | AFFX-HUMISGF3A/M97935_5_at | 5.4                            | 3.9                         | 10.6                           | 9.6                         |
| STAT2       | signal transducer and activator of transcription 2                                | 225636_at                  | 3.9                            | 3.4                         | 6.9                            | 6.3                         |
| IFI6        | interferon, alpha-inducible protein 6 (G1P3)                                      | 204415_at                  | 8.0                            | 14.3                        | 23.3                           | 58.9                        |
| IFI27       | interferon, alpha-inducible protein 27                                            | 202411_at                  | 15.0                           | 89.9                        | 1020                           | 210                         |
| IFI30       | interferon, alpha-inducible protein 30                                            | 201422_at                  | 2.5                            | 2.1                         | 4.0                            | 5.1                         |
| IFI35       | interferon, alpha-inducible protein 35                                            | 209417_s_at                | 3.8                            | 4.2                         | 27.9                           | 4.3                         |
| IFIT3       | interferon-induced protein with tetratricopeptide repeats 3                       | 229450_at                  | 33.7                           | 48.3                        | 84.0                           | 30.4                        |
| IFITM1      | interferon induced transmembrane protein 1 (9-27)                                 | 214022_s_at                | 2.3                            | 6.3                         | 7.5                            | 13.8                        |
| IRF9        | interferon regulatory factor 9                                                    | 203882_at                  | 4.3                            | 5.2                         | 9.5                            | 21.0                        |
| NMI         | N-myc (and STAT) interactor                                                       | 203964_at                  | 3.4                            | 7.0                         | 9.2                            | 7.4                         |
| CASP1       | caspase 1, apoptosis-related cysteine peptidase (interleukin 1, beta, convertase) | 211367_s_at                | 3.4                            | 0.5                         | 23.9                           | 51.0                        |

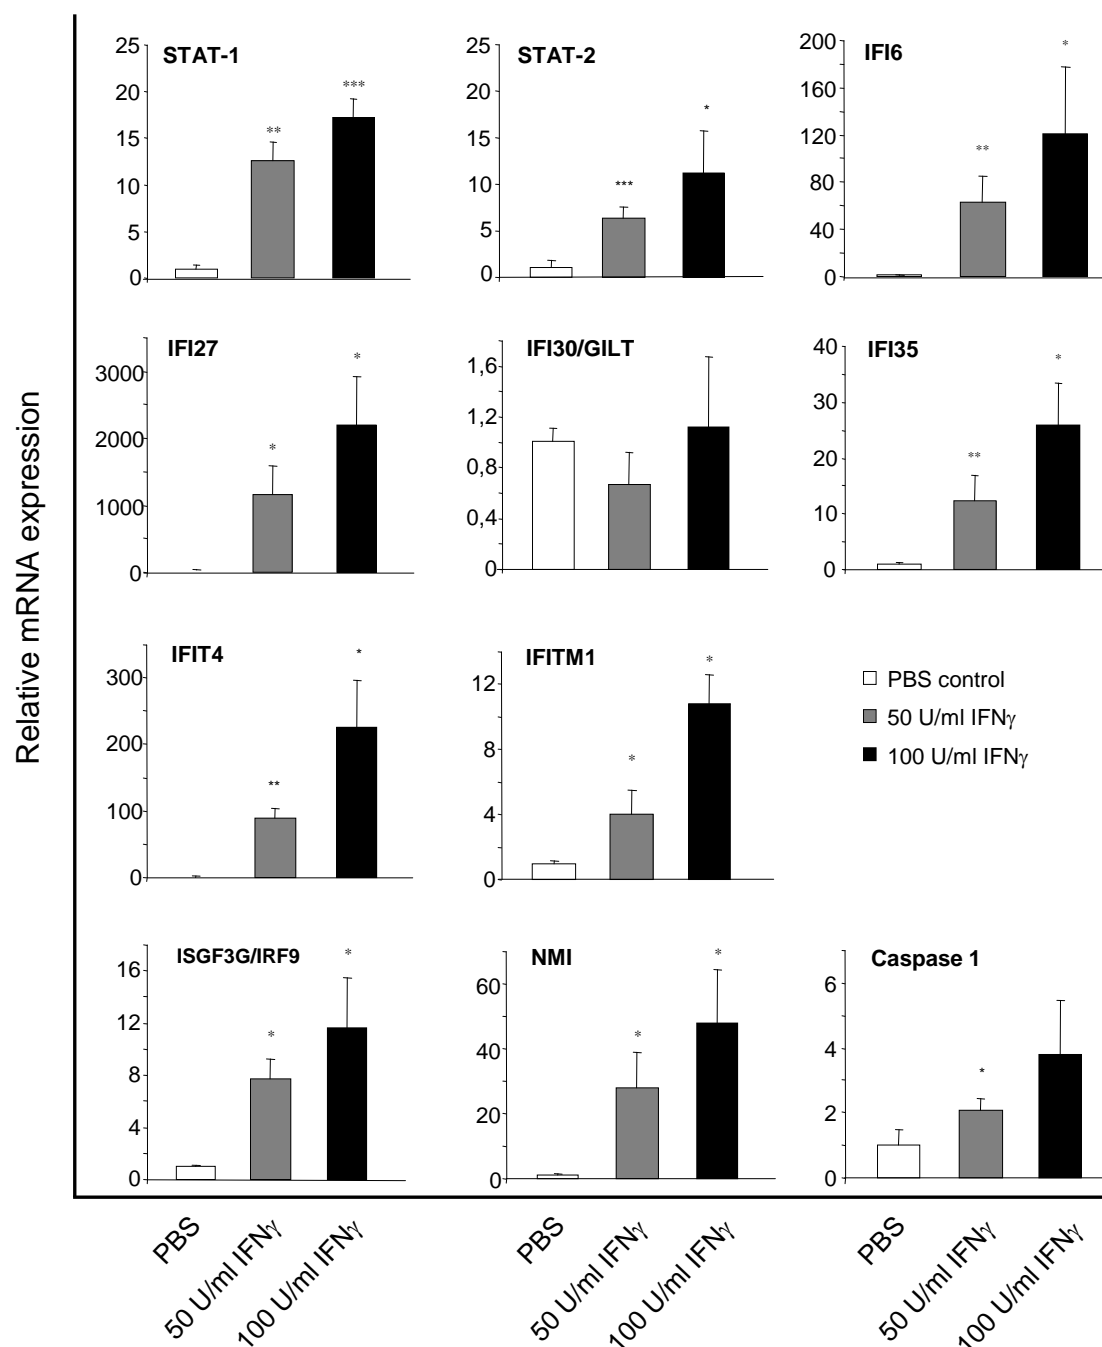

**Supplemental figure 1.** Transcriptional regulation of doxorubicin stimulated genes upon IFN $\gamma$  treatment. HeLa cells were treated with PBS (solvent), 50 U/ml or 100 U/ml IFN $\gamma$  for 48 h, RNA was extracted, reverse transcribed and analyzed by qRT-PCR. Mean+SD, n=3, \*  $p < 0.01$ , \*\*  $p < 0.05$  and \*\*\*  $p < 0.001$ .

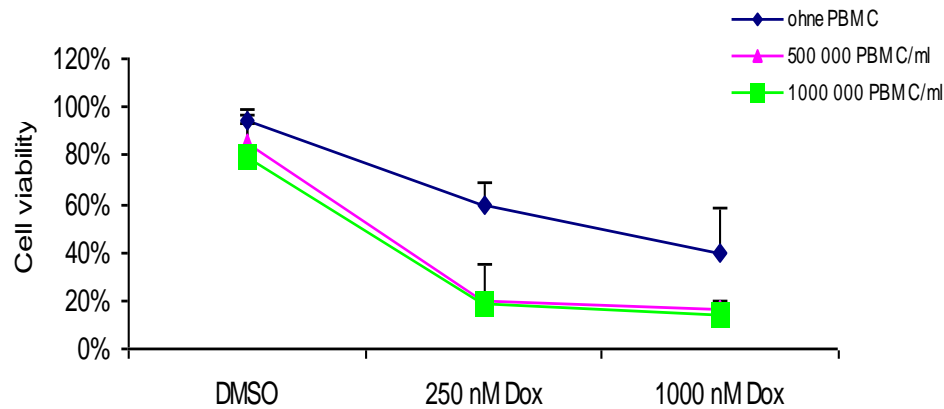

**Supplemental figure 2.** Influence of PBMCs (peripheral blood mononuclear cells) isolated from healthy volunteers on doxorubicin induced HeLa cell killing in dependence of treatment with doxorubicin (Dox) at 250 nM and 1  $\mu$ M. HeLa cells were seeded at a density of 5000 cells per well in 96-well plate and treated 24 h later with DMSO or Dox for further 24 h. Thereafter, IL-2 activated (48 h) PBMCs were added to HeLa cells at the indicated dilutions and 48 h later the supernatant containing PBMCs were removed, HeLa cells were washed with PBS for eliminating all of the PBMCs and HeLa cell viability was determined using AlamarBlue assay according to the manufacturer's instructions (Invitrogen). Mean and SD, n=3.
